# Supplementary material for: Surface charge modulation enhanced high stability of gold oxidation intermediates for electrochemical glucose sensors
Source: Royal Society of Chemistry journal article supplement (doi:10.1039/d2ay01375d), 2022-01-01
Supplement: d2ay01375d1.pdf [file d2ay01375d1.pdf]

## Supporting Information

### **Surface charge modulation enhanced high stability of gold oxidation intermediate for electrochemical glucose sensors**

Qingyi Yang<sup>a,b</sup>, Fengchao Sun<sup>a,b</sup>, Xingzhao Wang<sup>a,b</sup>, Jiabing Luo<sup>a</sup>, Shutao Wang<sup>b,\*</sup>,  
Cuiping Jia<sup>c</sup>, Yuan Pan<sup>b,\*</sup>, Jun Zhang<sup>a</sup>, Yan Zhou<sup>a,\*</sup>

- a. School of Materials Science and Engineering, China University of Petroleum (East China), Qingdao 266580, CHINA
- b. School of Chemistry and Chemical Engineering, China University of Petroleum (East China), Qingdao 266580, CHINA
- c. College of Science, China University of Petroleum (East China), Qingdao 266580, CHINA

Corresponding Authors:

[shtwang@upc.edu.cn](mailto:shtwang@upc.edu.cn); [panyuan@upc.edu.cn](mailto:panyuan@upc.edu.cn); [yanzhou@upc.edu.cn](mailto:yanzhou@upc.edu.cn)

---

**Table S1** Inductively coupled plasma emission spectra result of Au300 Cu Foam, Au300 Fe Foam and Au300 Ni Foam.

---

| <b>Inductive Coupled Plasma Emission Spectrometer</b> |                |                   |                     |
|-------------------------------------------------------|----------------|-------------------|---------------------|
| <b>Sample Name</b>                                    | <b>Element</b> | <b>Weight (%)</b> | <b>Atomic Ratio</b> |
| <b>Au300 Cu Foam</b>                                  | Cu             | 99.4403           | 1                   |
|                                                       | Au             | 0.4317            | 0.0014              |
| <b>Au300 Fe Foam</b>                                  | Fe             | 99.3168           | 1                   |
|                                                       | Au             | 0.0419            | 0.00012             |
| <b>Au300 Ni Foam</b>                                  | Ni             | 99.1595           | 1                   |
|                                                       | Au             | 0.5682            | 0.0017              |

---

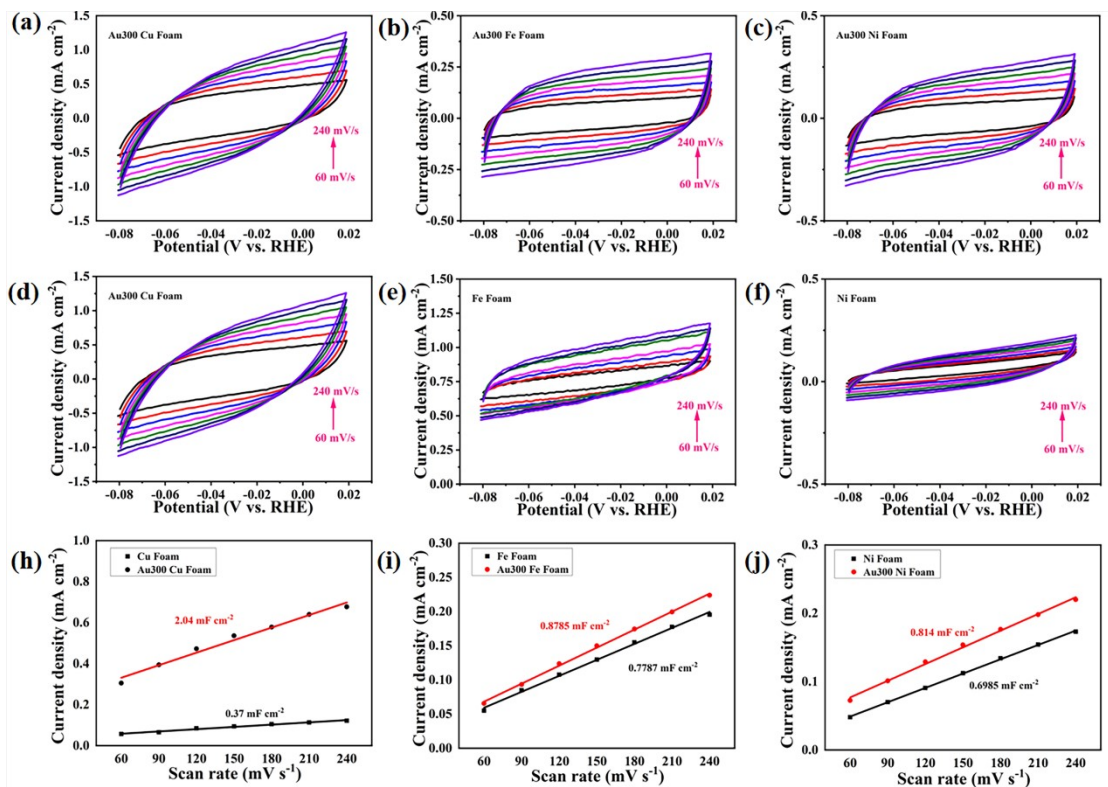

**Fig S1.** (a)CV curves of (a)Au300 Cu Foam, (b)Au300 Fe Foam, (c)Au300 Ni Foam, (d)Cu Foam, (e)Fe Foam, and (f)Ni Foam in 0.1 M KOH with scan rate of 60, 90, 120, 150, 180, 210, and 240 mV s<sup>-1</sup>. (g-i) The  $C_{dl}$  of different samples.

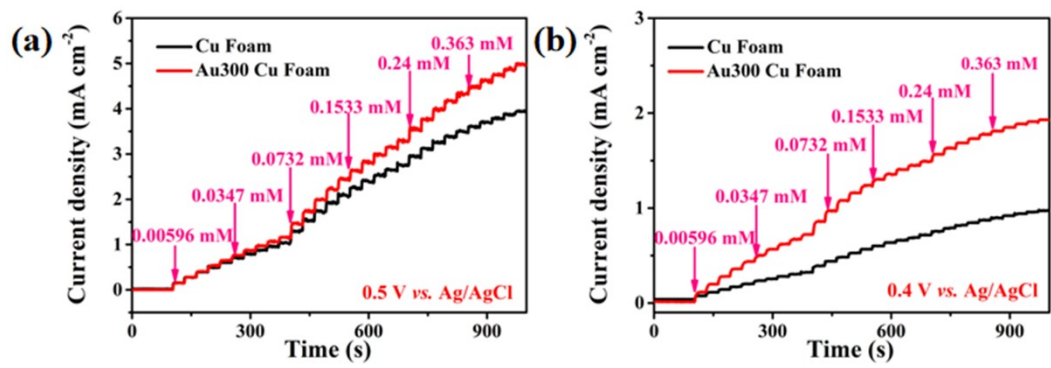

**Fig S2.** (a)Chronoamperometry response of Cu Foam and Au300 Cu Foam toward glucose in 0.1 M KOH with continuous glucose at 0.5 V vs. Ag/AgCl. (b)Chronoamperometry response of Cu Foam and Au300 Cu Foam toward glucose in 0.1 M KOH with continuous glucose at 0.4 V vs. Ag/AgCl.

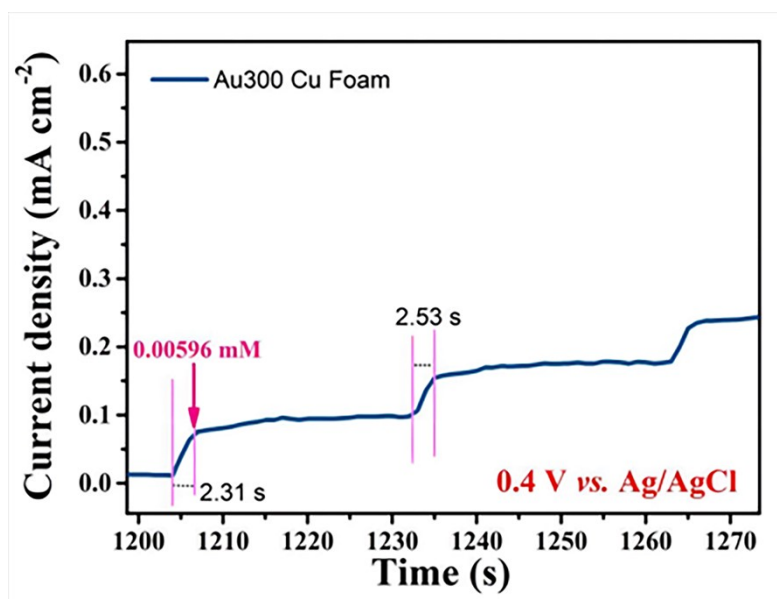

**Fig S3.** The enlarged figure of Chronoamperometry response of Au300 Cu Foam toward glucose in 0.1 M KOH with continuous glucose at 0.4 V vs. Ag/AgCl.

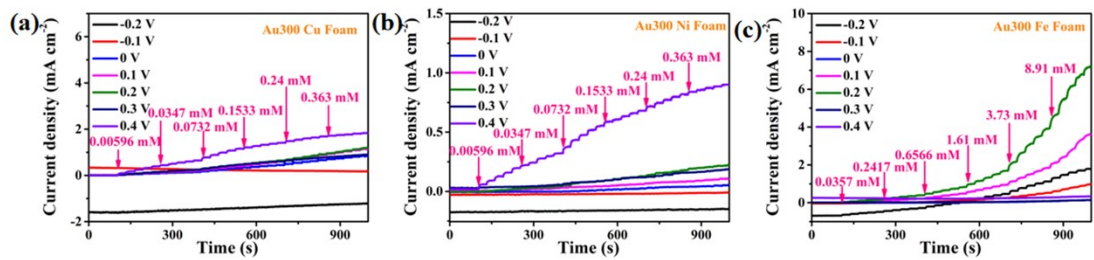

**Fig S4.** Chronoamperometry response of (a)Au300 Cu Foam, (b)Au300 Fe Foam, and (c)Au300 Ni Foam

toward glucose in 0.1 M KOH with continuous glucose at the various test potential.

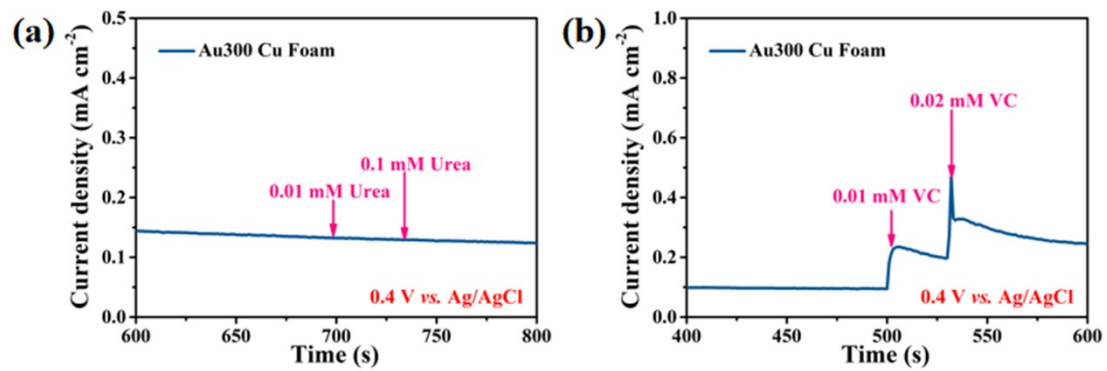

**Fig S5.** Chronoamperometry response of Au300 Cu Foam toward (a) urea and (b) ascorbic acid (VC) in 0.1 M KOH in the absence of glucose at 0.4 V vs. Ag/AgCl.

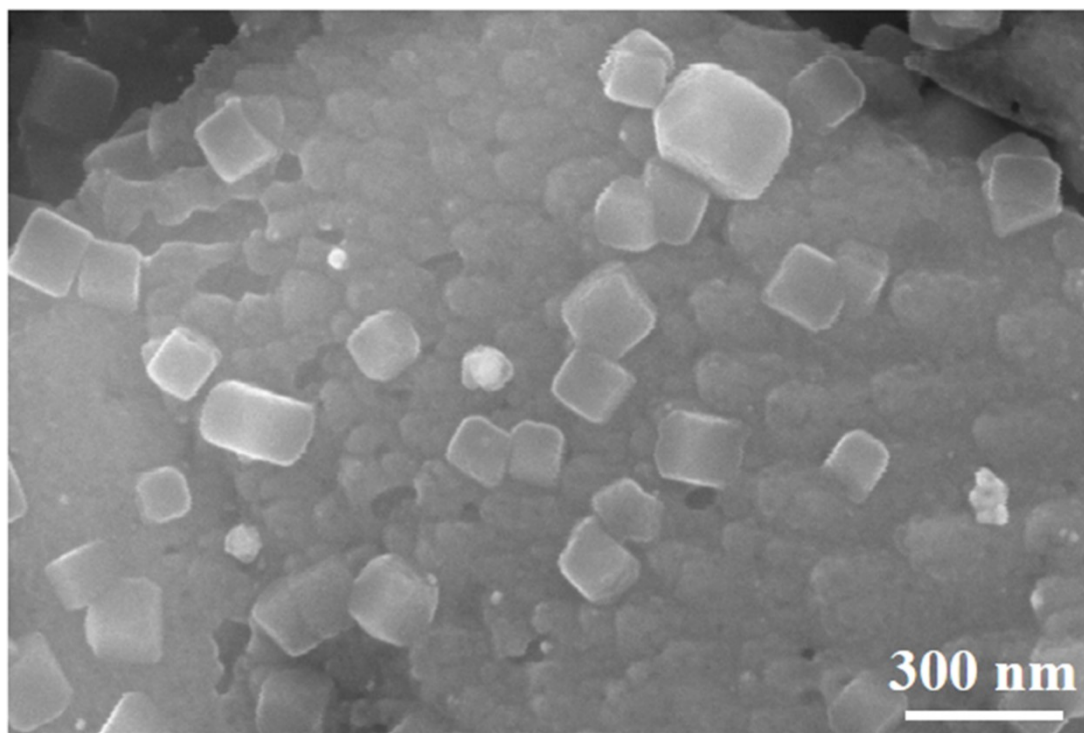

**Fig S6.** SEM image of Au<sub>300</sub> Cu Foam after the stability test.
